# Supplementary material for: Summertime temperatures, social disadvantage, and energy rationing: Patterns of energy insecurity from population-level historical electricity data in New York State
Source: Research Square preprint supplement (doi:10.21203/rs.3.rs-6184819/v1), 2025-04-24
Supplement: Supplementary file 1 [file da2f08c3a090ffcd0ea7a2c5.docx]

**Supplemental Materials**

Summertime temperatures, social disadvantage, and energy rationing: Patterns of energy insecurity from population-level New York State historical electricity data

**Authors:** Daniel Carrión1,2*, Xuezhixing Zhang1, Anna Stouffer1, Alice Fan3, Diana Hernández4,5, Isabel Shargo6, Allan C. Just7,8, Brendan Brown6

**Suppl 1. Definition of heat index cooling degree days**

We first calculate heat index cooling degree days (HICDD) as a function of temperature (T, °F) and relative humidity (RH, %) by the following steps:

1. If *T* ≤ 40 *°F*, then use *T* as the heat index. Go to Step II.
2. if *A* = -10.3 + 1.1*T* + 0.047*RH* < 79 *°F*. Then use *A* as the heat index. Go to Step III.
3. We calculate

If *RH* < 13% and 80 *°F* ≤ *T* ≤ 112 *°F*, let *HI* = *B* - () × ()0.5.

Else if *RH* < 85% and 80 *°F* ≤ *T* ≤ 87 *°F*, then let *HI* = *B* + 0.02 × (*RH* - 85) × (87 - *T*).

Else let *HI* = *B*.

1. The HICDD can then be calculated as:

where i is the day of the season summed over n days of the month.

**Suppl Table 1.** Monthly averages of the number of zip code tabulation areas (ZCTAs), counties, households, and population represented in the true and imputed datasets. In total, 51.12% observations in the analytical dataset were imputed. *Total is not the sum of the true and imputed, instead it represents the totals in New York State based on administrative data (e.g. Census data).

| **Data** | ZCTAs (SD) | Counties (SD) | Number of Households (SD) | Population Size (SD) | Total Observations (%) |
| --- | --- | --- | --- | --- | --- |
| **True Data** | 620.23 (54.91) | 46.27 (2.10) | 4,675,268.36 (1,015,112.48) | 10,895,989.95 (2496009.42) | 13,645 (30.42%) |
| **Imputed Data** | 1116.64 (136.63) | 59.80 (2.45) | 5,566,475.64 (1,595,367.88) | 12,872,735.80 (3,895,204.27) | 27,916 (62.24%) |
| **Total in New York State*** | 1794 (0) | 62 (0) | 8,284,051.00 (65,341.00) | 19,640,261.00 (110,730.00) | 44,850 (100%) |

**Suppl Table 2.** Monthly energy consumption (MWh) in ZCTA areas (2016-2020).

| **Month** | True Data | |
| --- | --- | --- |
| Mean (SD) | Median (IQR) |
| **May** | 2032.10 (2296.65) | 1061.29 (2645.32) |
| **June** | 2443.68 (2861.70) | 1189.70 (3184.41) |
| **July** | 3502.05 (4192.93) | 1566.38 (4906.48) |
| **August** | 3752.98 (4463.92) | 1711.21 (5344.52) |
| **September** | 3219.99 (3820.89) | 1466.64 (4565.52) |

**Suppl Table 3.** Measures of predication accuracy of the imputation model in MWh.

| **Mean absolute error** | **Root mean squared error** | **Median** | **Mean absolute deviation from the median** |
| --- | --- | --- | --- |
| 547.62 | 1382.95 | 794.40 | 928.66 |
